# Supplementary material for: Resveratrol Enhances Cytotoxic Effects of Cisplatin by Inducing Cell Cycle Arrest and Apoptosis in Ovarian Adenocarcinoma SKOV-3 Cells through Activating the p38 MAPK and Suppressing AKT
Source: MDPI journal article supplement (doi:10.3390/ph16050755), 2023-05-17
Supplement: s1 [file s1]

Supplementary Figure and Table

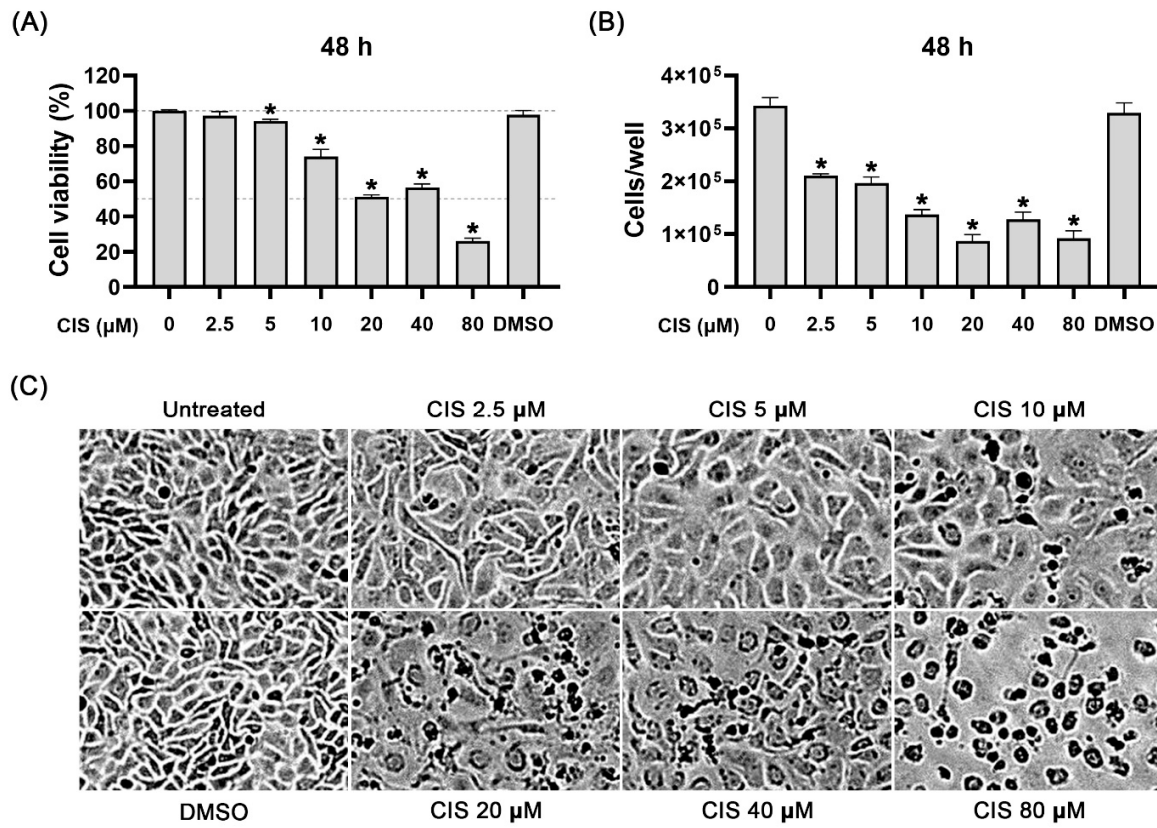

**Figure S1.** Effect of cisplatin at varied concentrations (0-80 μM) for 48 h on SKOV-3 cell viability (determined by MTT assay) (A), cell proliferation (assayed by direct cell counting) (B), and cell morphological changes (examined by phase-contrast microscopy) (C). \*  $p < 0.05$  vs untreated cells

**Table S1.** Synergism quotient of cisplatin on the RES-induced reduction in cell viability at 24 h and 48 h

| <b>24 h</b>            | <b>Cell viability (%)</b> | <b>Inhibition Rate</b> | <b>SQ Value</b> |
|------------------------|---------------------------|------------------------|-----------------|
| Cisplatin              | 86.55 ± 1.57              | 13.45                  |                 |
| 25 µM RES              | 99.11 ± 0.72              | 0.89                   |                 |
| Cisplatin + 25 µM RES  | 80.83 ± 0.72              | 19.17                  | 1.34            |
| 50 µM RES              | 99.26 ± 1.27              | 0.74                   |                 |
| Cisplatin + 50 µM RES  | 78.60 ± 1.85              | 21.40                  | 1.51            |
| 100 µM RES             | 95.39 ± 1.95              | 4.61                   |                 |
| Cisplatin + 100 µM RES | 69.17 ± 0.65              | 30.83                  | 1.71            |
| 200 µM RES             | 64.41 ± 1.46              | 35.59                  |                 |
| Cisplatin + 200 µM RES | 59.96 ± 0.59              | 40.04                  | 0.82            |
| <b>48 h</b>            | <b>Cell viability (%)</b> | <b>Inhibition Rate</b> | <b>SQ Value</b> |
| Cisplatin              | 50.28 ± 3.03              | 49.72                  |                 |
| 25 µM RES              | 93.14 ± 0.80              | 6.86                   |                 |
| Cisplatin + 25 µM RES  | 53.78 ± 0.64              | 46.22                  | 0.82            |
| 50 µM RES              | 76.77 ± 2.55              | 23.23                  |                 |
| Cisplatin + 50 µM RES  | 40.87 ± 4.15              | 59.13                  | 0.81            |
| 100 µM RES             | 53.40 ± 0.10              | 46.60                  |                 |
| Cisplatin + 100 µM RES | 29.56 ± 0.10              | 70.44                  | 0.73            |
| 200 µM RES             | 12.69 ± 0.96              | 87.31                  |                 |
| Cisplatin + 200 µM RES | 20.46 ± 1.15              | 79.54                  | 0.58            |

**Table S2.** Synergism quotient of cisplatin on the RES-induced apoptosis at 24 h and 48 h

| <b>24 h</b>            | <b>Apoptosis (%)</b> | <b>SQ Value</b> |
|------------------------|----------------------|-----------------|
| Cisplatin              | 6.76 ± 1.89          |                 |
| 25 µM RES              | 3.94 ± 0.69          |                 |
| Cisplatin + 25 µM RES  | 8.00 ± 1.70          | 0.75            |
| 50 µM RES              | 2.70 ± 0.08          |                 |
| Cisplatin + 50 µM RES  | 9.67 ± 2.44          | 1.02            |
| 100 µM RES             | 3.26 ± 0.62          |                 |
| Cisplatin + 100 µM RES | 17.86 ± 0.47         | 1.78            |
| <b>48 h</b>            | <b>Apoptosis (%)</b> | <b>SQ Value</b> |
| Cisplatin              | 7.76 ± 1.31          |                 |
| 25 µM RES              | 4.27 ± 0.99          |                 |
| Cisplatin + 25 µM RES  | 13.08 ± 1.61         | 1.09            |
| 50 µM RES              | 3.93 ± 0.40          |                 |
| Cisplatin + 50 µM RES  | 22.52 ± 1.82         | 1.93            |
| 100 µM RES             | 5.47 ± 0.22          |                 |
| Cisplatin + 100 µM RES | 44.02 ± 1.60         | 3.33            |
